# Supplementary material for: Overexpression of a Gene Involved in Phytic Acid Biosynthesis Substantially Increases Phytic Acid and Total Phosphorus in Rice Seeds
Source: PubMed Central journal article supplement (PMC4844318; doi:10.3390/plants4020196), 2015-04-24
Supplement: plants-04-00196-s001.pdf [file plants-04-00196-s001.pdf]

# Supplementary Material

**Table S1.** List of primers for RT-PCR analysis.

| Gene           | RAP ID       | Primer Sequences     |                       | Amplicon Size(bp) |
|----------------|--------------|----------------------|-----------------------|-------------------|
|                |              | Forward              | Reverse               |                   |
| <i>OsPGK1</i>  | Os02g0819400 | CGCTTCTTGCCTTGCTTTGA | GCCTTGCATCCCATGAGTTG  | 212               |
| <i>RINO1</i>   | Os03g0192700 | CCGTGGCATGTGGCAAAGAG | TGCATAGCCCGATAAGAGTC  | 132               |
| <i>OsMIK</i>   | Os03g0737700 | TCCATCCATGGCGCCCTCTC | TCCACCTCAACCACCACTTC  | 75                |
| <i>OsIMP</i>   | Os03g0587000 | ATCTGATGGCACGAAGAATG | CAATGCCATACTGCGTCCAA  | 218               |
| <i>OsITPK1</i> | Os10g0103800 | TCCTACTCAGCCTTGTGC   | TCAATGGTATCACTCTCG    | 92                |
| <i>OsITPK2</i> | Os03g0230500 | TTCACCGATTTCTTGCTG   | TGACTGCTAGACCGTTAC    | 119               |
| <i>OsITPK3</i> | Os03g0726200 | TACAAACGACGACCAAGC   | TTACCACGGAGGATTTGC    | 136               |
| <i>OsITPK4</i> | Os02g0466400 | ACAAGACCTGTTCTGAGCA  | CGAGCTGACGGGCCAACACC  | 157               |
| <i>OsITPK5</i> | Os10g0576100 | CGAGGTACCAGGTATGCT   | TCTCTTGGCTGCTCTAAC    | 238               |
| <i>OsITPK6</i> | Os09g0518700 | GAAGCAGATGACACAAAC   | CTAAGTGACAAGCAACCT    | 142               |
| <i>OsIPK1</i>  | Os04g0661200 | GTGTCTGTTGTATCTTGGTG | AAATTCGGCCTACTGCTGAG  | 155               |
| <i>OsMRP13</i> | Os03g0142800 | GGAGCACTACCAAGATAAGC | ATTGGTGA ACTCCAGAAAAC | 213               |
| <i>OsST</i>    | Os04g0652400 | ATACAACGAGCGAATGATGC | GCTGAGAGAACAGGGTGGAA  | 198               |
| <i>Actin</i>   | Os03g0836000 | GAACAAC TGGGACGACAT  | CCTTTGGGTT CAGAGGAG   | 113               |

© 2015 by the authors; licensee MDPI, Basel, Switzerland. This article is an open access article distributed under the terms and conditions of the Creative Commons Attribution license (<http://creativecommons.org/licenses/by/4.0/>).
